# Supplementary material
Source: Springer Nature journal article supplement (https://www.springermedizin.de/resource/supplementary/13017_2009_129_MOESM2_ESM.pdf/9635530)

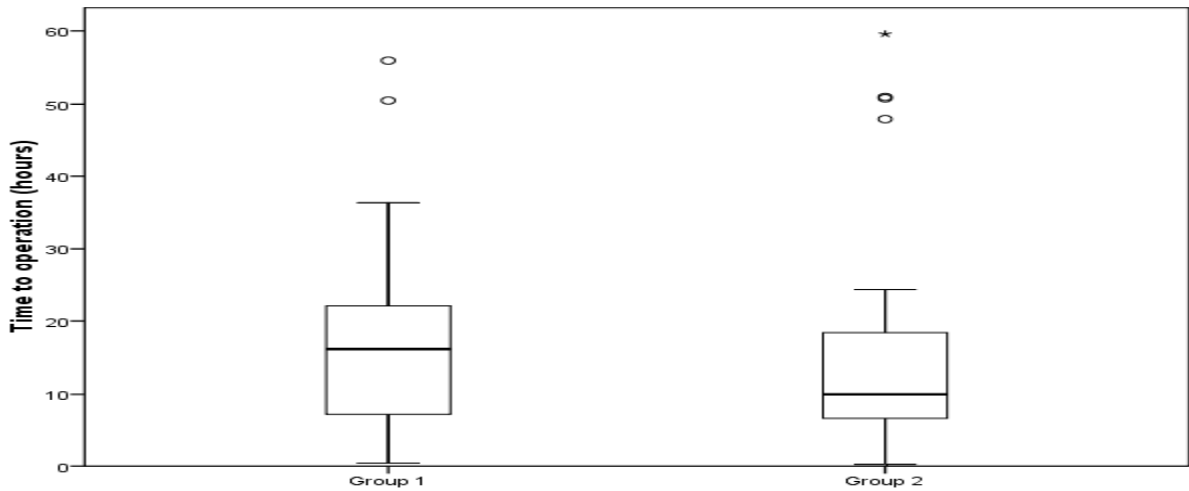

**a**

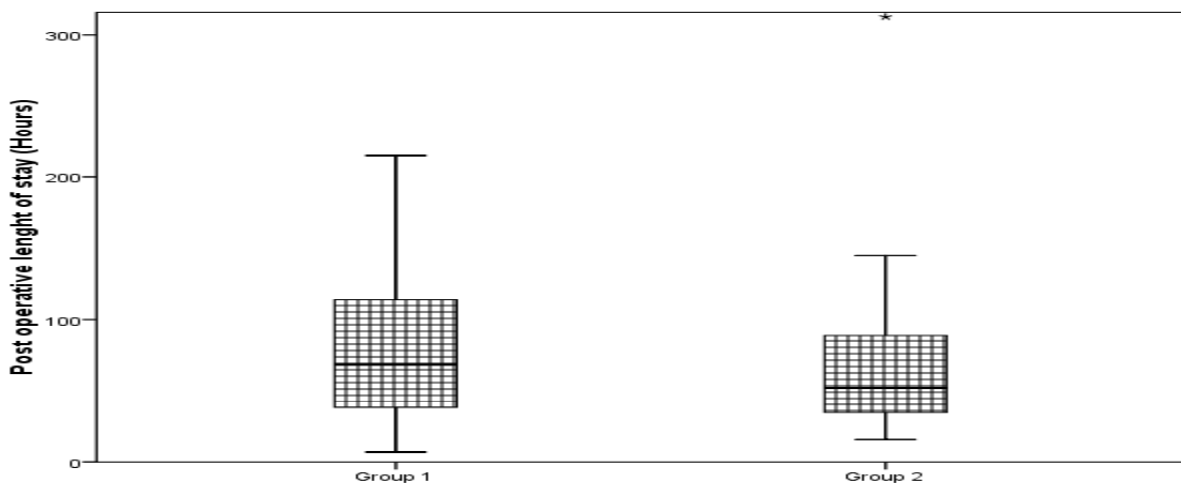

**b**

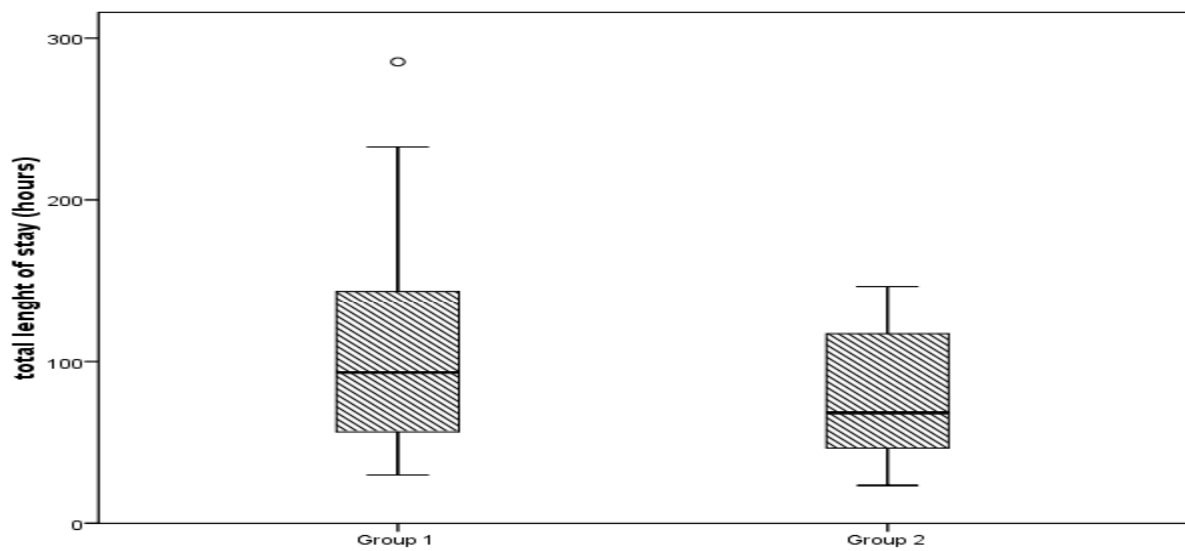

**c**

Supplement: MOESM2 [file 9635530]
